# Supplementary material for: Pervasive duplication of tumor suppressors in Afrotherians during the evolution of large bodies and reduced cancer risk
Source: eLife journal article supplement (doi:10.7554/elife.65041), 2021-01-29
Supplement: supp [file Atlantogenata_Reactome_ORA.xlsx]

## Sheet: Afroinsectivora
geneSet

## Sheet: Afrosoricida
geneSet

## Sheet: AnyProboscidea
geneSet

## Sheet: Chrysochloris.asiatica
geneSet

## Sheet: Echinops.telfairi
geneSet

## Sheet: Elephantidae
geneSet

## Sheet: Elephantulus.edwardii
geneSet

## Sheet: Elephas.maximus
geneSet

## Sheet: Loxodona
geneSet

## Sheet: Loxodonta.africana
geneSet

[truncated: 14 more sheets: Loxodonta.cyclotis, Loxodontini, Mammut.americanum, Mammuthus, Mammuthus.columbi, Mammuthus.primigenius, Orycteropus.afer, Paenungulata, Palaeoloxodon.antiquus, Proboscidea, Procavia.capensis, Pseudoungulata, Tethytheria, Trichechus.manatus]
